# Supplementary material
Source: Springer Nature journal article supplement (https://www.springermedizin.de/resource/supplementary/12985_2009_781_MOESM5_ESM.pdf/9609148)

**pSGR**

**pSGR-GFP**

**pSGR-GND-GFP**

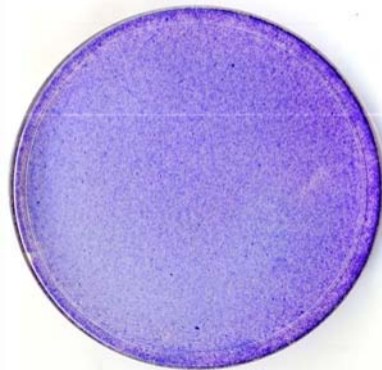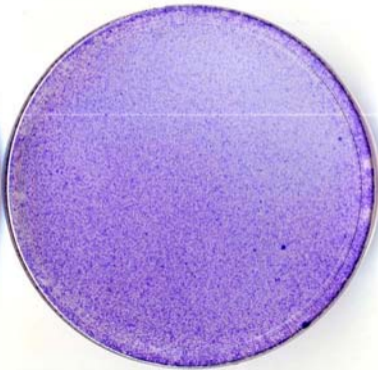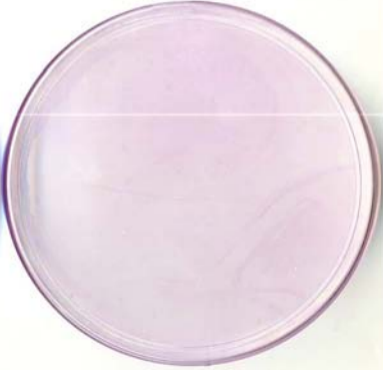

Supplement: MOESM5 [file 9609148]
